# Supplementary material for: Identification of an immunogenic DKK1 long peptide for immunotherapy of human multiple myeloma
Source: PubMed Central journal article supplement — Haematologica. 2020 Feb 20;106(3):838–46. doi: 10.3324/haematol.2019.236836 (PMC7927895; doi:10.3324/haematol.2019.236836), 2020-02-20
Supplement: 2019_236836-Disclosures_Contributions.pdf [file 2019_236836-Disclosures_Contributions.pdf]

Haematologica  
HAEMATOL/2019/236836  
Version 3

Identification of an immunogenic DKK1 long peptide for immunotherapy  
of human multiple myeloma

Rong Li, Chengyun Zheng, Qiang Wang, Enguang Bi, Maojie Yang,  
Jian Hou, Weijun Fu, Qing Yi, and Jianfei Qian

Disclosures: None

Contributions: JQ, RL and QY initiated the study. JQ, RL, and CZ designed the experiments and wrote the paper. RL and JQ performed most of the experiments and statistical analyses. QW prepared human samples. EB helped with animal experiments. MY assisted in generating mice. JH and WF provided important suggestions.
